# Supplementary material
Source: PubMed Central journal article supplement (PMC7656916)
Supplement: advancesADV2020002758-suppl1.pdf [file advancesADV2020002758-suppl1.pdf]

## Supplemental Materials

|                          | <b>Gene</b>                 | <b>Forward (5' – 3')</b> | <b>Reverse (5' – 3')</b>  |
|--------------------------|-----------------------------|--------------------------|---------------------------|
| <b>Genomic PCR</b>       | V $\gamma$ 2-J $\gamma$ 1   | TGGACATGGGAAGTTGGAG      | CAGAGGGAATTACTATGAGC      |
|                          | V $\gamma$ 3-J $\gamma$ 1   | GATCAGCTCTCCTTTACCC      |                           |
|                          | V $\gamma$ 4-J $\gamma$ 1   | CTGGGGTCATATGTCATCAA     |                           |
|                          | V $\gamma$ 5-J $\gamma$ 1   | GCTAACCTACCATTCTCTGT     |                           |
|                          | V $\gamma$ 1.1-J $\gamma$ 4 | CTCCATATTTCTCCAACACAGC   | ACTACGAGCTTTGTCCCTTGG     |
|                          | V $\gamma$ 1.2-J $\gamma$ 2 |                          | ACTATGAGCTTTGTTCCTTCTGCAA |
|                          | V $\delta$ 4                | CCGCTTCTCTGTGAACTTCC     | CAGTCACTTGGGTTCCCTTGTC    |
|                          | V $\delta$ 5                | CAGATCCTTCCAGTTCATCC     |                           |
|                          | Gapdh                       | AGGTCGGTGTGAACGGATTG     | TGTAGACCATGTAGTTGAGGTCA   |
| C $\delta$               | TTGAGAGAGAGAACCCGTAT        | CTCTCCTGTGTGACTATTGG     |                           |
| <b>Copy number assay</b> | C $\delta$ (primer)         | CTGGAATGGTACCGCACAGTAG   | AAGAGGGAGCGGTGGTATCA      |
|                          | C $\delta$ (probe)          | CACCAGCCTTCCCA           |                           |
| <b>RT-PCR</b>            | V $\gamma$ 2-C $\gamma$     | GGAGTACAAGAAAATGGAGG     | CTTATGGAGATTTGTTTCAGC     |
|                          | V $\gamma$ 3-C $\gamma$     | CATCGGATGAAGCCACGTA      |                           |
|                          | V $\gamma$ 4-C $\gamma$     | AGTGACAGAAGAGGACACG      |                           |
|                          | V $\gamma$ 5-C $\gamma$     | CGATTCTGCTCTGTACTACT     |                           |
|                          | V $\gamma$ 1.1-C $\gamma$   | AACTTCTACCTCAACCTTGA     |                           |
|                          | V $\gamma$ 1.2-C $\gamma$   | AAGTTCTACCTCAACCTTGG     |                           |
|                          | Gapdh                       | AGGTCGGTGTGAACGGATTG     | TGTAGACCATGTAGTTGAGGTCA   |

**Table S1. List of primer/probe sequences**

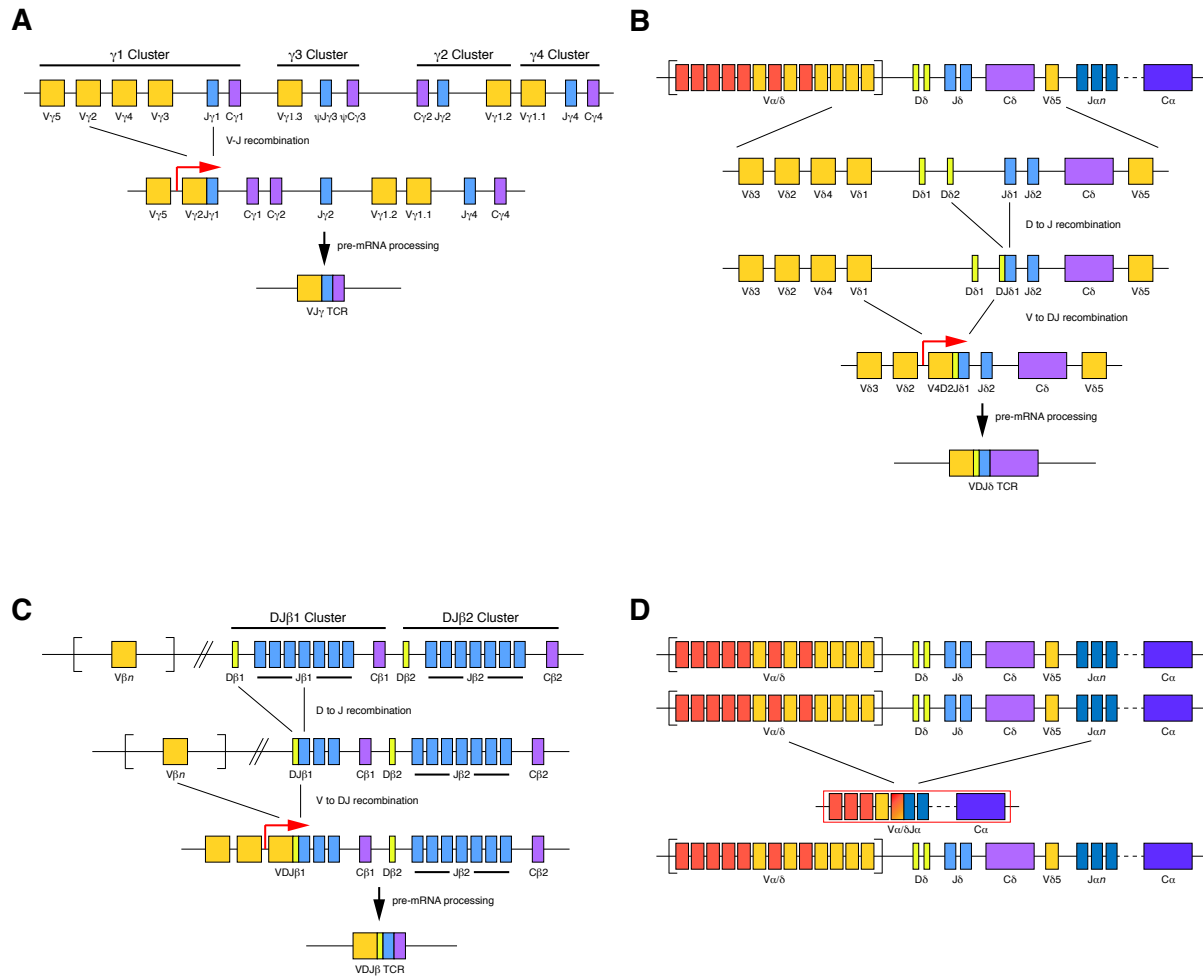

**Figure S1.** Comprehensive schematic of TCR $\gamma$  (A), TCR $\delta$  (B), TCR $\beta$  (C) and TCR $\alpha$  (D), and their rearrangement mechanism. Transcription is marked by a red arrow.

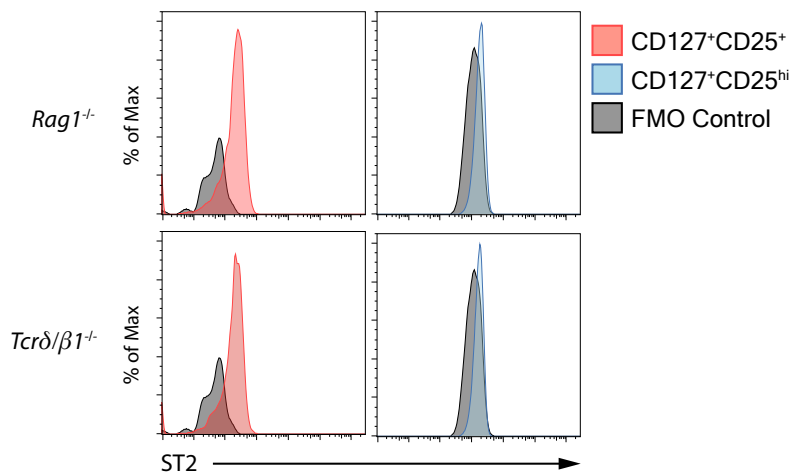

**Figure S2.** Expression of ST2 in *Rag1*<sup>-/-</sup> and *Tcr $\delta/\beta$* <sup>-/-</sup> thymic ILC2s. Thymic CD45.2<sup>+</sup>Lin<sup>-</sup>Thy1.2<sup>+</sup> cells in both *Rag1*<sup>-/-</sup> and *Tcr $\delta/\beta$* <sup>-/-</sup> mice were further characterized into CD127<sup>+</sup>CD25<sup>+</sup>

and CD127<sup>+</sup>CD25<sup>hi</sup> populations and the expressions of ST2 were analyzed. CD127<sup>+</sup>CD25<sup>+</sup> (red) and CD127<sup>+</sup>CD25<sup>hi</sup> (green) subsets were compared against ST2 null (grey).
